# Supplementary material for: Blue hydrogenated lithium titanate as a high-rate anode material for lithium-ion batteries
Source: Royal Society of Chemistry journal article supplement (doi:10.1039/c4ta00556b), 2014-01-01
Supplement: c4ta00556b1.pdf [file c4ta00556b1.pdf]

## Electronic Supporting Information

### Blue hydrogenated lithium titanate as high-rate anode material for lithium-ion batteries

Jingxia Qiu, Chao Lai, Evan Gray, Sheng Li, Siyao Qiu, Ekaterina Strounina,  
Chenghua Sun, Huijun Zhao, and Shanqing Zhang\*

\* Corresponding author. Tel: 61 5552 8155; Fax: 61 5552 8067;  
E-mail: s.zhang@griffith.edu.au

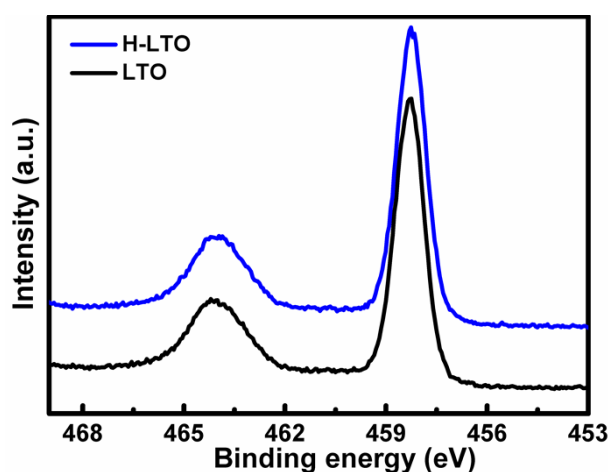

Fig. S1 XPS of the blue H-LTO and pristine LTO.

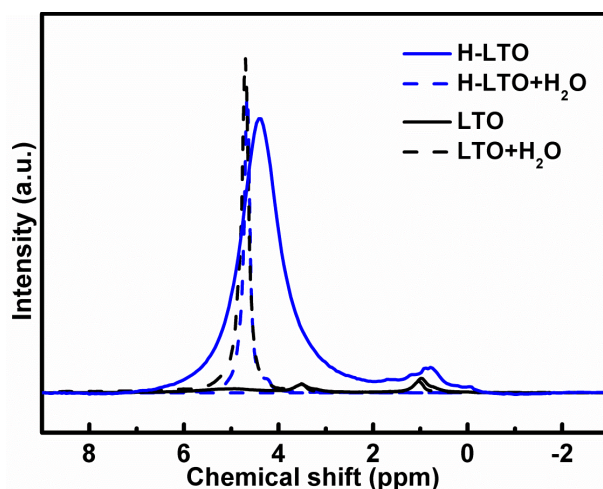

Fig. S2 <sup>1</sup>H NMR solid state spectra of the chemical shift of LTO and H-LTO with and without H<sub>2</sub>O.

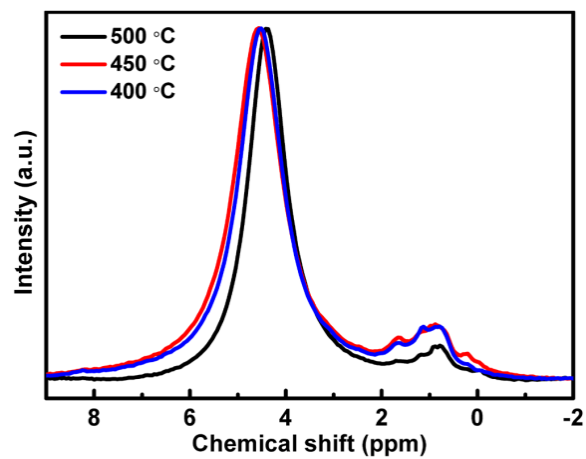

Fig. S3 <sup>1</sup>H NMR solid state spectra of the chemical shift of LTO and H-LTO at different temperature.

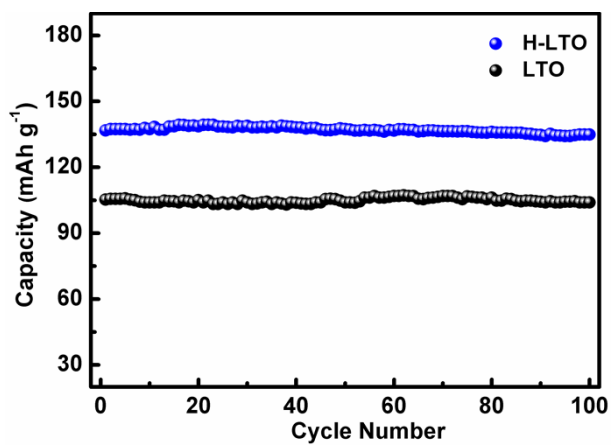

Fig. S4 Specific charge and discharge capacities of the white and blue LTO at 5 C rate.

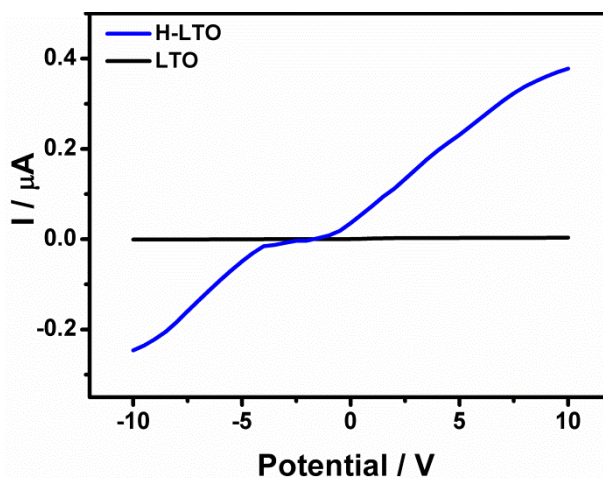

Fig. S5  $i$ - $V$  current measurement of the blue H-LTO and white pristine LTO pellets that were prepared by compressing 0.10 g of powders under 15 tons  $\text{inch}^{-2}$  pressure.

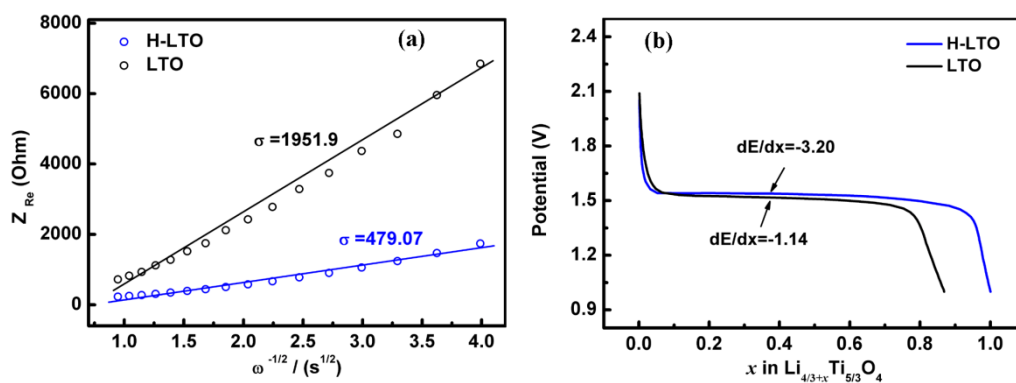

Fig. S6 (a)  $Z_{Re}$  vs.  $\omega^{-1/2}$  in plots in the low frequency region according to Nyquist plots of the pristine LTO and blue H-LTO; (b) The specific depth of discharge curves of the pristine LTO and H-LTO which were used to calculate the lithium diffusion coefficient  $D_{Li}$ .
